# Supplementary material
Source: ML conference proceedings conference paper supplement (https://openaccess.thecvf.com/content/CVPR2023/html/Du_Avatars_Grow_Legs_CVPR_2023_paper.html)
Supplement: Supplementary file 3 [file Du_Avatars_Grow_Legs_CVPR_2023_supplemental.zip]

Archive with 6 entries (6 files):
- agrol_video_51s_trim_compressed.mp4
- __MACOSX/._agrol_video_51s_trim_compressed.mp4
- jogging_demo_trimmed_8sec.mp4
- __MACOSX/._jogging_demo_trimmed_8sec.mp4
- AGRoL_avatars_grow_legs_camera_ready_supp_mat_compressed.pdf
- __MACOSX/._AGRoL_avatars_grow_legs_camera_ready_supp_mat_compressed.pdf
